# Supplementary material for: Xeno-Free 3D Bioprinted Liver Model for Hepatotoxicity Assessment
Source: MDPI journal article supplement (doi:10.3390/ijms25031811), 2024-02-02
Supplement: s1 [file s1]

# Supporting Material

## Xeno-Free 3D Bioprinted Liver Model for Hepatotoxicity Assessment

### Authors

*Ahmed S. M. Ali<sup>1</sup>, Johanna Berg<sup>1</sup>, Viola Roehrs<sup>1</sup>, Dongwei Wu<sup>1</sup>, Johannes Hackethal<sup>2</sup>, Albert Braeuning<sup>3</sup>, Lisa Woelken, Cornelia Rauh<sup>4</sup>, Jens Kurreck<sup>1,\*</sup>*

### Affiliations

<sup>1</sup> Department of Applied Biochemistry, Technische Universität Berlin, Berlin, Germany

<sup>2</sup> THT Biomaterials, Vienna, Austria

<sup>3</sup> Department Food Safety, German Federal Institute for Risk Assessment (BfR), Berlin, Germany

<sup>4</sup> Department of Food Biotechnology and Food Process Engineering, Technische Universität Berlin, Germany

### **\*Corresponding author:**

Prof. Dr. Jens Kurreck

Technische Universität Berlin, Institute of Biotechnology

Department of Applied Biochemistry, TIB 4/3-2

Gustav-Meyer-Allee 25, 13355 Berlin, Germany

Email: jens.kurreck@tu-berlin.de

**Table S1.** Volumes used to coat flasks and plates.

| Vessel         | Volume of diluted collagen I |
|----------------|------------------------------|
| T75 flask      | 5 ml per flask               |
| T25 flask      | 2 ml per flask               |
| 12 well plates | 500 µl per well              |
| 24 well plates | 300 µl per well              |
| 96 well plates | 50 µl per well               |

**Table S2.** Cell lines

| Cell line | Catalogue number | Supplier                    |
|-----------|------------------|-----------------------------|
| HUH-7     | 330156           | CLS Cell Lines Service GmbH |

**Table S3.** Chemicals and reagents

| Item                                                                           | Catalogue number | Supplier                         |
|--------------------------------------------------------------------------------|------------------|----------------------------------|
| DMEM low glucose medium                                                        | L0064            | Biowest                          |
| Fetal calf serum (FCS)                                                         | S-14-L           | c.c.pro GmbH                     |
| D-(+)-glucose                                                                  | G8769            | Sigma                            |
| L-glutamine                                                                    | X0550            | Biowest                          |
| Penicillin/streptomycin (100x)                                                 | L0022            | Biowest                          |
| Dulbecco's phosphate buffered saline (DPBS)                                    | L0615            | Biowest                          |
| Human placental collagen I                                                     | THT0102          | THT Biomaterials GmbH            |
| Acetic acid                                                                    | 27225-M          | Sigma                            |
| DMEM-F12                                                                       | L0090            | Biowest                          |
| 4-(2-Hydroxyethyl)-piperazin-1-ethansulfonsäure (HEPES)                        | L0180            | Biowest                          |
| MEM Non-Essential Amino Acids 100X (NEAA)                                      | X0557 - 100      | Biowest                          |
| GlutaMAX 100x)                                                                 | 35050            | Gibco, Life Technologies limited |
| Insulin-Transferrin-Selenium (100x)                                            | 41400045         | Gibco, Life Technologies Corp.   |
| Recombinant human hepatocyte growth factor (HGF)                               | PHG0254          | Gibco, Life Technologies Corp.   |
| Recombinant human epidermal growth factor (EGF)                                | PHG0313          | Gibco, Life Technologies Corp.   |
| TrypLE™ Express                                                                | 12604021         | Gibco, Life Science Corp.        |
| Polyvinylpyrrolidone (PVP)                                                     | PVP360           | Sigma                            |
| 2,3-bis-(2-methoxy-4-nitro-5-sulfophenyl)-2H-tetrazolium-5-carboxanilide (XTT) | J61726           | Alfa Aesar                       |
| Phenazine methyl sulfate (PMS)                                                 | A2212,005        | AppliChem                        |
| Sodium alginate                                                                | W201502          | Sigma                            |
| Human serum                                                                    | H5667            | Sigma                            |
| Calcium sulphate dihydrate                                                     | 0256.2           | Roth                             |

**Table S4.** Composition of bioinks

| Component (each 1 mL)        | Xeno-free bioink | Matrigel based bioink |
|------------------------------|------------------|-----------------------|
| RPMI                         | 200 µL           | 100 µL                |
| Sod. alginate (10%)          | 250 µL           | 250 µL                |
| Human collagen I (3.2 mg/mL) | 100 µL           | N/A                   |
| CaSO <sub>4</sub> (1.22 M)   | 50 µL            | 50 µL                 |
| Matrigel                     | N/A              | 200 µL                |
| Supplement mix (I)           | N/A              | 400 µL                |
| Supplement mix (II)          | 400 µL           | N/A                   |

**Table S5.** Composition of the supplement mixtures

| Component (each 1 mL)                      | Supplement Mix (I) 2,5X | Supplement Mix (II) 2,5X |
|--------------------------------------------|-------------------------|--------------------------|
| RPMI                                       | 850 µL                  | 600 µL                   |
| Nonessential amino acids (NEAA)            | 25 µL                   | 25 µL                    |
| HEPES (1M)                                 | 75 µL                   | 75 µL                    |
| Penicillin – Streptomycin (10 000 000 U/L) | 25 µL                   | 25 µL                    |
| GlutaMAX                                   | 25 µL                   | 25 µL                    |
| Human serum                                | 0                       | 250 µL                   |

**Table S6.** Lab equipment

| Equipment               | Model              | Supplier   |
|-------------------------|--------------------|------------|
| Microextrusion printer  | BioX               | Cellink    |
| Rotational rheometer    | MCR 102            | Anton Paar |
| Microplate reader       | Sunrise            | Tecan      |
| Fluorescence microscope | Zeiss Observer. Z1 | Zeiss      |

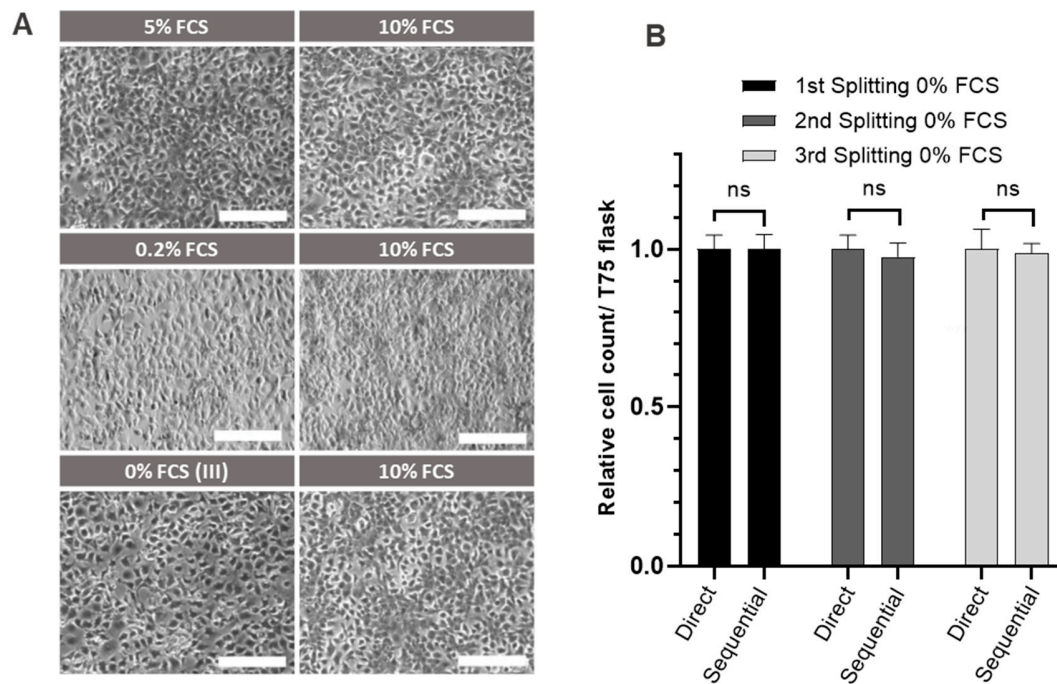

**Figure S1.** Sequential and direct adaptation of HuH-7 cells into CDM. (A) Representative optical microscope images in phase contrast mode of HuH-7 cells during sequential adaptation to CDM compared to that cultured in 10% FBS-containing media. Scale bar: 200  $\mu$ m. (B) Relative cell count of sequentially pre-adapted HuH-7 cells in CDM compared to directly adapted cells.

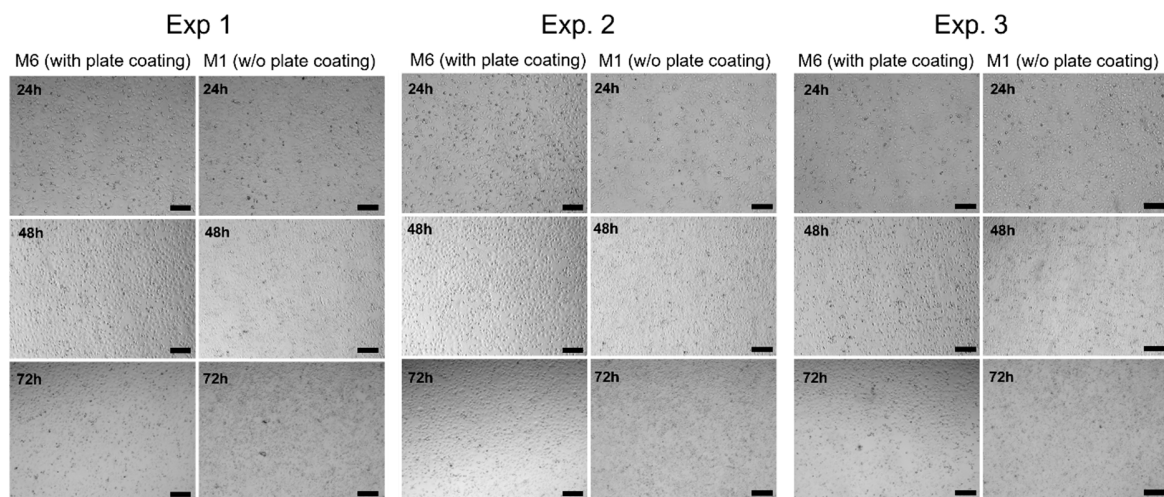

**Figure S2.** Representative optical microscope images of HuH-7 cells cultured in M6 (with plate coating) and M6 (without plate coating) after 24h, 48h and 72 h in three independent experiments. Scale bar: 200  $\mu$ m.

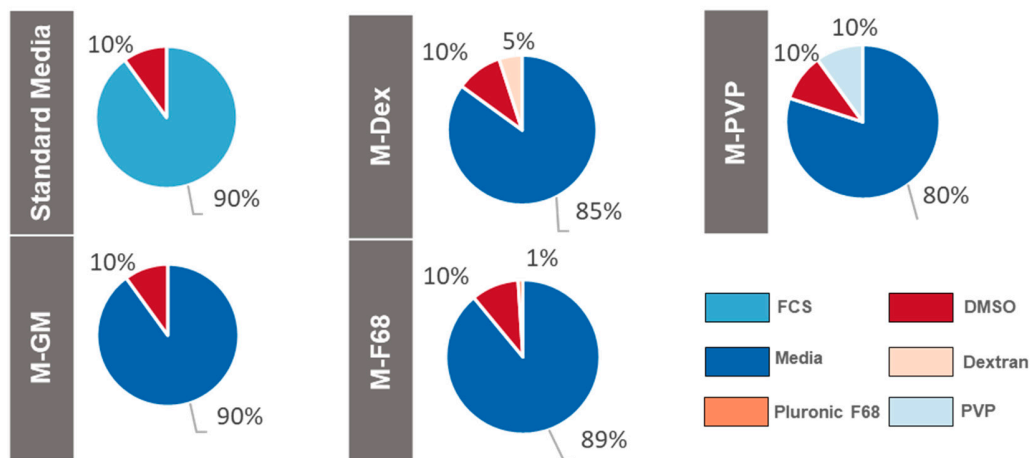

**Figure S3.** composition of the tested freezing media presented in pie charts. Each component is represented by a color as indicated in the lower right part.

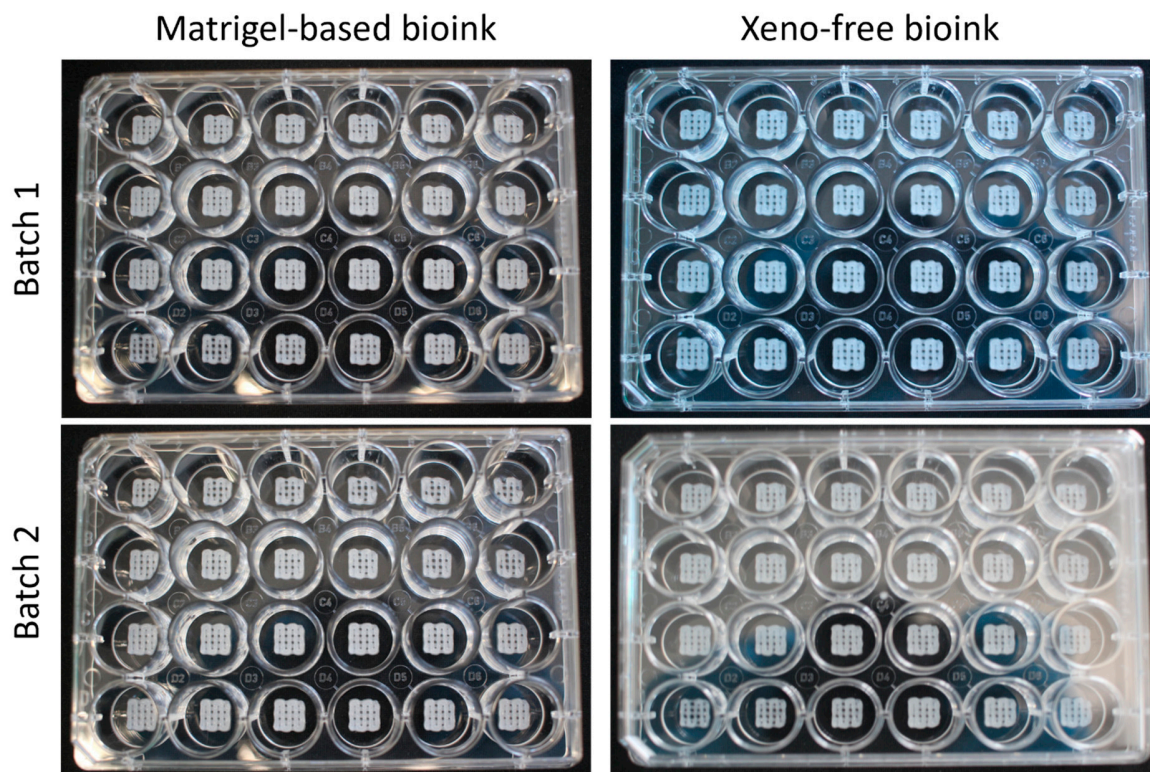

**Figure S4.** Reproducibility of bioprinting with Matrigel-based bioink and the xeno-free bioink in two different bioprinting batches.

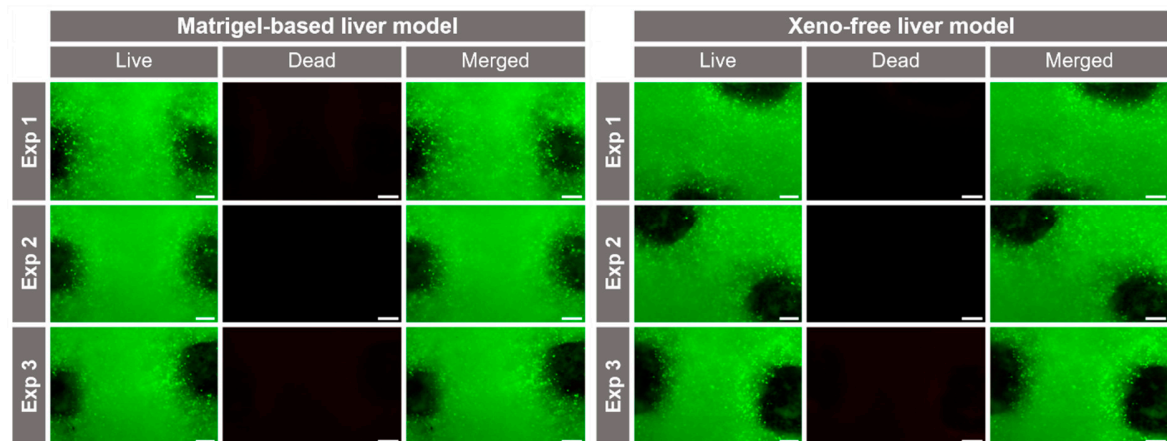

**Figure S5.** Viability of HuH-7 cells in different batches of 3D printed xeno-free and Matrigel-based liver models. Qualitative viability staining of living and dead HuH-7 cells in bioprinted models stained with calcein-AM (live in green) and ethidium homodimer-1 (dead in red). Scale bar: 200  $\mu$ m.
